# Supplementary material for: Lactobacillus rhamnosus FSJ13 alleviates pancreatic fibrosis in mice via fibroblast growth factor 21
Source: Royal Society of Chemistry journal article supplement (doi:10.1039/d5fo00832h), 2025-01-01
Supplement: d5fo00832h1.pdf [file d5fo00832h1.pdf]

## Supplementary Information

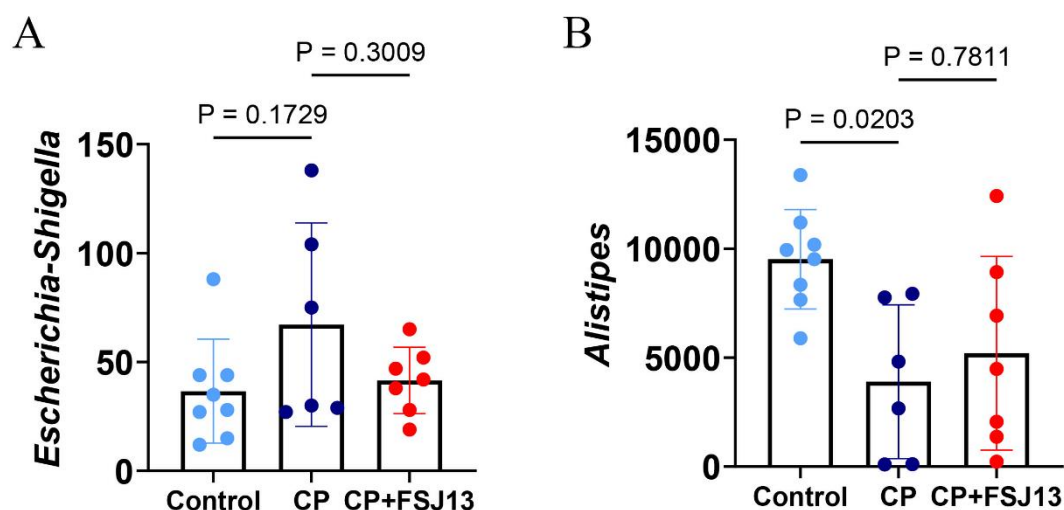

**Figure. S1.** *L. rhamnosus* FSJ13 modulated gut microbiota composition in CP mice. (A) Relative abundance of *Escherichia-Shigella*, (B) Relative abundance of *Alistipes*. (control:  $n=7$ , CP:  $n=6$ , CP+FSJ13:  $n=7$ ). Control: intraperitoneal injection of saline; CP: chronic pancreatitis group, intraperitoneal injection of caerulein; CP+FSJ13: *L. rhamnosus* FSJ13 treatment group, intraperitoneal injection of caerulein and gavage of *L. rhamnosus* FSJ13. Data were expressed as mean  $\pm$  SD. P values were calculated by one-way ANOVA followed by Tukey's *post hoc* test for multiple comparisons.
